# Supplementary material for: The Oxidative Stability of Champagne Base Wines Aged on Lees in Barrels: A 2-Year Study
Source: MDPI journal article supplement (doi:10.3390/antiox13030364), 2024-03-18
Supplement: s1 [file s1]

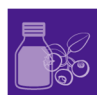

## Supplementary Materials

**Table S1.** Summary of the wine samples: Chardonnay musts from two consecutive vintages 2020 and 2021 and two different geographical origins aged in new barrels. Barrels were all provided by the Tonnellerie de Champagne with the same process (double light toasting).

| Vintage                  | 2020                                                                                   |                                                                                        |                                                                                        | 2021                                                                                     |                                                                                          |                                                                                          |
|--------------------------|----------------------------------------------------------------------------------------|----------------------------------------------------------------------------------------|----------------------------------------------------------------------------------------|------------------------------------------------------------------------------------------|------------------------------------------------------------------------------------------|------------------------------------------------------------------------------------------|
| Age of barrels           | New barrels                                                                            |                                                                                        |                                                                                        | New barrels                                                                              |                                                                                          |                                                                                          |
| Musts and origins        | Chardonnay 2020<br>from Montgueux (Aube)                                               |                                                                                        |                                                                                        | Chardonnay 2021<br>from Montgueux (Aube)                                                 |                                                                                          |                                                                                          |
| Yeasting                 | IOC 18-2007                                                                            |                                                                                        |                                                                                        | Zymaflore® Spark                                                                         |                                                                                          |                                                                                          |
| Barrels                  | 12 x  | 12 x  | 12 x  | 10 x  | 10 x  | 10 x  |
| Time ageing and sampling | 3 months                                                                               | 6 months                                                                               | 9 months                                                                               | 3 months                                                                                 | 6 months                                                                                 | 9 months                                                                                 |
| Barrel specifications    | Tonnellerie de Champagne, Hermonville, France<br>Double light toasting (160 °C)        |                                                                                        |                                                                                        |                                                                                          |                                                                                          |                                                                                          |

**Table S2.** Oenological parameters of musts samples of vintages 2020 and 2021

| Chardonnay musts                                    |              |              |
|-----------------------------------------------------|--------------|--------------|
| Age of barrels                                      | New barrels  |              |
| Oenological parameter                               | Vintage 2020 | Vintage 2021 |
| Gluconic acid (g/L)                                 | 0.000        | 0.027        |
| Ammoniacal nitrogen (mg/L)                          | 127          | 135          |
| Density (g/dm <sup>3</sup> ) at 20 °C               | 1077         | 1071         |
| Potential alcohol (% v/v)                           | 10.7         | 10.0         |
| Total SO <sub>2</sub> (mg/L)                        | 57           | 55           |
| pH                                                  | 3.11         | 3.05         |
| Total acidity (g H <sub>2</sub> SO <sub>4</sub> /L) | 6.6          | 8.9          |
| Volatile acidity (g/L acetic acid)                  | -            | 0.04         |
| Turbidity (NTU)                                     | 39           | 19           |

**Table S3.** Oenological parameters of wines samples fermented and aged in new barrels of vintages 2020 and 2021

|                                                     |             | Chardonnay wines |             |             |              |             |             |
|-----------------------------------------------------|-------------|------------------|-------------|-------------|--------------|-------------|-------------|
|                                                     |             | New barrels      |             |             |              |             |             |
|                                                     |             | Vintage 2020*    |             |             | Vintage 2021 |             |             |
| Oenological parameter                               | End of AF   | 3 months         | 6 months    | 9 months    | 3 months     | 6 months    | 9 months    |
| Alcohol strength (% v/v)                            | -           | 11.2 ± 0.1       | 11.3 ± 0.1  | 11.4 ± 0.1  | 11.0 ± 0.0   | 11.1 ± 0.0  | 11.1 ± 0.0  |
| pH                                                  | 3.08 ± 0.01 | 2.99 ± 0.01      | 3.07 ± 0.01 | 3.12 ± 0.02 | 2.89 ± 0.01  | 2.93 ± 0.01 | 2.95 ± 0.00 |
| Total acidity (g H <sub>2</sub> SO <sub>4</sub> /L) | 6.5 ± 0.0   | 5.9 ± 0.1        | 5.1 ± 0.2   | 5.0 ± 0.1   | 8.3 ± 0.0    | 8.3 ± 0.0   | 8.0 ± 0.0   |
| Volatile acidity (g/L acetic acid)                  | 0.20 ± 0.01 | 0.28 ± 0.01      | 0.28 ± 0.02 | 0.39 ± 0.03 | 0.47 ± 0.01  | 0.47 ± 0.03 | 0.59 ± 0.04 |
| Total SO <sub>2</sub> (mg/L)                        | 44 ± 1      | 55 ± 1           | 60 ± 2      | 56 ± 6      | 63 ± 2       | 62 ± 2      | 62 ± 3      |
| Free SO <sub>2</sub> (mg/L)                         | 13 ± 1      | 13 ± 1           | 15 ± 2      | 15 ± 2      | 20 ± 1       | 14 ± 1      | 15 ± 0      |
| Residuals sugars (g/L)                              | 1.6 ± 1.7   | 0.4 ± 0.1        | 0.4 ± 0.1   | 0.4 ± 0.1   | 0.4 ± 0.1    | 0.4 ± 0.1   | 0.4 ± 0.0   |

\*wines from vintage 2020 underwent MLF.

Table S4. Raw data of  $Ec_{20}$  and molecular ellagitannins concentrations of each barrel for vintages 2020 and 2021

|                                  |        | $Ec_{20}$ |    |    | Castalin (mg equivalent ellagic acid/L) |     |     | Castalagin (mg equivalent ellagic acid/L) |      |      | Vescalagin (mg equivalent ellagic acid/L) |      |      |
|----------------------------------|--------|-----------|----|----|-----------------------------------------|-----|-----|-------------------------------------------|------|------|-------------------------------------------|------|------|
|                                  | Barrel | T3        | T6 | T9 | T3                                      | T6  | T9  | T3                                        | T6   | T9   | T3                                        | T6   | T9   |
| Vintage 2020<br>(12 new barrels) | B23    | 23        | 23 | 16 | 0.8                                     | 0.8 | 1.3 | 4.0                                       | 5.1  | 6.7  | 3.9                                       | 4.6  | 5.7  |
|                                  | B24    | 23        | 23 | 17 | 0.7                                     | 1.3 | 1.6 | 2.6                                       | 5.3  | 7.1  | 2.5                                       | 4.5  | 6.0  |
|                                  | B25    | 23        | 23 | 16 | 0.7                                     | 1.2 | 1.5 | 3.5                                       | 6.1  | 8.7  | 2.8                                       | 4.8  | 6.6  |
|                                  | B26    | 23        | 23 | 17 | 0.4                                     | 1.2 | 1.4 | 2.9                                       | 5.9  | 7.5  | 2.3                                       | 4.3  | 5.3  |
|                                  | B27    | 23        | 23 | 17 | 0.4                                     | 1.3 | 1.5 | 3.1                                       | 6.2  | 7.1  | 2.8                                       | 5.0  | 5.8  |
|                                  | B28    | 22        | 21 | 16 | 0.8                                     | 1.5 | 1.3 | 4.2                                       | 8.1  | 8.6  | 3.7                                       | 6.8  | 7.0  |
|                                  | B29    | 22        | 21 | 14 | 1.0                                     | 1.9 | 1.5 | 6.3                                       | 9.2  | 13.0 | 4.6                                       | 6.4  | 8.7  |
|                                  | B30    | 23        | 20 | 15 | 0.7                                     | 1.3 | 1.5 | 4.6                                       | 8.7  | 10.6 | 4.0                                       | 7.1  | 8.4  |
|                                  | B31    | 22        | 18 | 14 | 0.7                                     | 1.3 | 1.8 | 6.8                                       | 10.8 | 13.0 | 5.9                                       | 8.6  | 10.5 |
|                                  | B32    | 21        | 20 | 13 | 0.9                                     | 2.0 | 1.7 | 5.9                                       | 11.3 | 14.3 | 5.8                                       | 9.9  | 12.7 |
|                                  | B33    | 23        | 20 | 15 | 0.9                                     | 1.5 | 1.4 | 4.3                                       | 9.2  | 9.6  | 4.0                                       | 7.3  | 7.3  |
|                                  | B34    | 22        | 18 | 14 | 0.9                                     | 1.6 | 1.8 | 5.5                                       | 12.0 | 13.0 | 4.3                                       | 8.6  | 9.2  |
| Vintage 2021<br>(10 new barrels) | B50    | 16        | 19 | 17 | 0.6                                     | 0.8 | 0.9 | 6.1                                       | 9.3  | 11.2 | 5.3                                       | 7.4  | 8.6  |
|                                  | B51    | 16        | 16 | 17 | 0.5                                     | 0.8 | 1.1 | 7.1                                       | 10.1 | 11.7 | 5.0                                       | 6.3  | 7.2  |
|                                  | B52    | 16        | 22 | 19 | 0.6                                     | 0.5 | 1.2 | 3.7                                       | 4.9  | 6.2  | 2.8                                       | 3.4  | 4.1  |
|                                  | B53    | 15        | 19 | 17 | 0.5                                     | 0.8 | 0.9 | 5.9                                       | 8.8  | 10.9 | 3.8                                       | 5.3  | 6.2  |
|                                  | B54    | 16        | 21 | 19 | 0.7                                     | 0.6 | 1.1 | 3.3                                       | 4.8  | 5.7  | 2.4                                       | 3.1  | 3.4  |
|                                  | B55    | 15        | 19 | 17 | 0.9                                     | 1.4 | 1.7 | 5.4                                       | 7.6  | 9.2  | 3.4                                       | 4.3  | 4.8  |
|                                  | B56    | 18        | 22 | 19 | 0.4                                     | 0.9 | 0.9 | 4.3                                       | 5.9  | 7.3  | 4.3                                       | 5.2  | 5.9  |
|                                  | B57    | 16        | 19 | 17 | 0.7                                     | 0.5 | 0.8 | 6.8                                       | 11.0 | 13.3 | 5.6                                       | 7.7  | 9.6  |
|                                  | B58    | 15        | 18 | 15 | 0.7                                     | 1.2 | 1.3 | 10.3                                      | 14.3 | 18.9 | 7.7                                       | 10.3 | 12.3 |
|                                  | B59    | 16        | 18 | 17 | 0.6                                     | 0.9 | 1.1 | 7.4                                       | 11.7 | 14.5 | 6.3                                       | 8.9  | 10.4 |

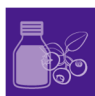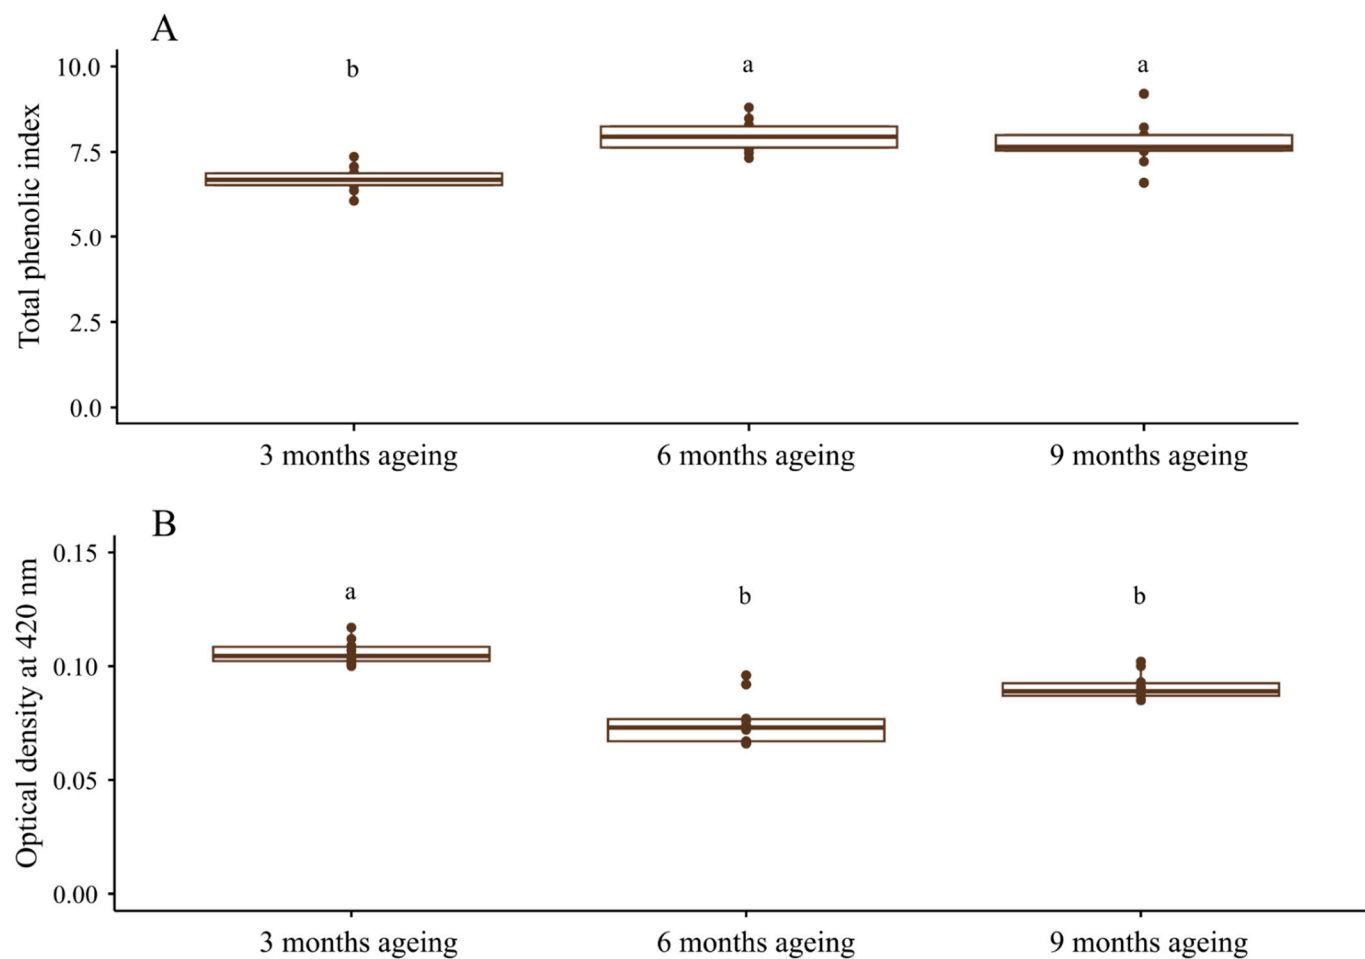

**Figure S1.** Evolution of I<sub>280</sub> (A) and A<sub>420</sub> (B) of 10 wines aged in new barrels during 9 months (Kruskal-Wallis test, *p*-value < 0.05)

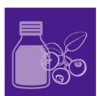**Table S5.** Summary of discussed features with their characteristics. Level of confidence are adapted from Schymanski et al., 2014 [19]

| General information |                          | Annotations                                                                   |                                            |                    | Additional details               |                                     |
|---------------------|--------------------------|-------------------------------------------------------------------------------|--------------------------------------------|--------------------|----------------------------------|-------------------------------------|
| RT<br>[min]         | Neutral mass<br>[M] [Da] | Molecular Formula                                                             | Compound annotation                        | Annotations' level | Behavior during<br>barrel ageing | AM-RS or AM-NU                      |
| 3.7                 | 302.0420                 | C <sub>15</sub> H <sub>10</sub> O <sub>7</sub>                                | Quercetin                                  | 1                  | UP                               | strong AM-RS                        |
| 3.6                 | 138.0316                 | C <sub>7</sub> H <sub>6</sub> O <sub>3</sub>                                  | Salicylic acid                             | 1                  | UP                               | weak AM-RS                          |
| 2.1                 | 154.0265                 | C <sub>7</sub> H <sub>6</sub> O <sub>4</sub>                                  | Gentisic acid                              | 1                  | UP                               | strong AM-RS                        |
| 2.9                 | 302.0057                 | C <sub>14</sub> H <sub>6</sub> O <sub>8</sub>                                 | Ellagic acid                               | 1                  | UP                               | strong AM-RS                        |
| 0.9                 | 170.0213                 | C <sub>7</sub> H <sub>6</sub> O <sub>5</sub>                                  | Gallic acid                                | 1                  | UP                               | strong AM-RS                        |
| 1.1                 | 934.0707                 | C <sub>41</sub> H <sub>26</sub> O <sub>26</sub>                               | Castalagin or vescalagin                   | 3                  | UP                               | strong AM-RS                        |
| 0.9                 | 174.0526                 | C <sub>7</sub> H <sub>10</sub> O <sub>5</sub>                                 | Shikimic acid                              | 1                  | UP                               | -                                   |
| 2.8                 | 244.1783                 | C <sub>12</sub> H <sub>24</sub> O <sub>3</sub> N <sub>2</sub>                 | LL                                         | 3                  | UP                               | -                                   |
| 0.6                 | 180.0630                 | C <sub>6</sub> H <sub>12</sub> O <sub>6</sub>                                 | <i>myo</i> -inositol                       | 1                  | UP                               | AM-RS                               |
| 1.4                 | 134.0216                 | C <sub>4</sub> H <sub>6</sub> O <sub>5</sub>                                  | Malic acid                                 | 2                  | DOWN                             | -                                   |
| 0.7                 | 192.0268                 | C <sub>6</sub> H <sub>8</sub> O <sub>7</sub>                                  | Citric acid                                | 2                  | DOWN                             | -                                   |
| 1.4                 | 312.0480                 | C <sub>13</sub> H <sub>12</sub> O <sub>9</sub>                                | Caftaric acid                              | 1                  | DOWN                             | -                                   |
| 1.6                 | 204.0896                 | C <sub>11</sub> H <sub>12</sub> O <sub>2</sub> N <sub>2</sub>                 | L-tryptophan                               | 1                  | -                                | AM-RS                               |
| 1.9                 | 191.0614                 | C <sub>7</sub> H <sub>13</sub> O <sub>3</sub> NS                              | N-acetyl-L-methionine                      | 2                  | UP                               | AM-RS                               |
| 2.9                 | 112.0158                 | C <sub>5</sub> H <sub>4</sub> O <sub>3</sub>                                  | 2-furancarboxylic acid                     | 3                  | UP                               | AM-RS                               |
| 0.9                 | 153.0089                 | C <sub>3</sub> H <sub>7</sub> O <sub>4</sub> NS                               | L-cysteine sulfinic acid                   | 3                  | -                                | AM-NU decreasing with barrel ageing |
| 2.2                 | 307.0826                 | C <sub>10</sub> H <sub>17</sub> O <sub>6</sub> N <sub>3</sub> S               | Glutathione                                | 2                  | -                                | AM-NU decreasing with barrel ageing |
| 3.4                 | 322.0933                 | C <sub>10</sub> H <sub>18</sub> O <sub>6</sub> N <sub>4</sub> S               | CNS or CGGS                                | 3                  | -                                | AM-NU decreasing with barrel ageing |
| 1.6                 | 617.1151                 | C <sub>23</sub> H <sub>27</sub> O <sub>15</sub> N <sub>3</sub> S              | 2-S-glutathionyl caftaric acid (GRP)       | 3                  | -                                | AM-NU decreasing with barrel ageing |
| 1.1                 | 922.1800                 | C <sub>33</sub> H <sub>42</sub> O <sub>21</sub> N <sub>6</sub> S <sub>2</sub> | 2,5-di-S-glutathionyl caftaric acid (GRP2) | 3                  |                                  | AM-NU decreasing with barrel ageing |
| 3.8                 | 361.2012                 | C <sub>19</sub> H <sub>27</sub> O <sub>4</sub> N <sub>3</sub>                 | FPV                                        | 3                  | -                                | AM-NU increasing with barrel ageing |
| 3.1                 | 333.1694                 | C <sub>17</sub> H <sub>23</sub> O <sub>4</sub> N <sub>3</sub>                 | AFP                                        | 3                  | -                                | AM-NU increasing with barrel ageing |
| 1.8                 | 154.0261                 | C <sub>7</sub> H <sub>6</sub> O <sub>4</sub>                                  | Gentisic acid (or isomers)                 | 3                  | -                                | AM-NU increasing with barrel ageing |
| 4.5                 | 140.0468                 | C <sub>7</sub> H <sub>8</sub> O <sub>3</sub>                                  | Gentisyl alcohol (or isomers)              | 3                  | -                                | AM-NU increasing with barrel ageing |

**Table S6.** Putative annotation of some derivatized compounds contributing to the AM-NU fraction. All detected features have been detected in free form. Putative peptides are amino acids combination and not amino acids sequence. Levels of confidence are adapted from Schymanski et al., 2014; Sumner et al., 2014 [19,20]: <sup>a</sup>1-9, <sup>b</sup>3-4.5. \* all KEGG propositions.

| General information |               |                       | KEGG Annotation                                                    |                   |                                                               |             | Home-made peptides database Annotation |                  |                                                               |             | Intra-laboratory white wine nucleophilic compounds list |             | (1) KEGG Putative Name<br>(2) Home-made peptides Databases<br>(3) Identification |
|---------------------|---------------|-----------------------|--------------------------------------------------------------------|-------------------|---------------------------------------------------------------|-------------|----------------------------------------|------------------|---------------------------------------------------------------|-------------|---------------------------------------------------------|-------------|----------------------------------------------------------------------------------|
| RT [min]            | Detected Mass | Neutral Mass [M] [Da] | Identity (ID)                                                      | Neutral Mass [Da] | Molecular Formula                                             | Error [ppm] | Peptide Sequences                      | Neutral Mass[Da] | Molecular Formula                                             | Error [ppm] | Identity                                                | Error [ppm] |                                                                                  |
| 0.7                 | 302.0784      | 180.0417              | C01179 /<br>C01197 /<br>C01405 /<br>C01481 /<br>C05350 /<br>C12623 | 180.0423          | C <sub>9</sub> H <sub>8</sub> O <sub>4</sub>                  | 3.3826      |                                        |                  |                                                               |             |                                                         |             | *Caffeic acid (1)                                                                |
| 0.9                 | 329.1749      | 207.1382              | C09912 /<br>C10567                                                 | 207.1372          | C <sub>11</sub> H <sub>17</sub> ON <sub>3</sub>               | -4.7698     |                                        |                  |                                                               |             |                                                         |             | Alchornine (1)<br>Arenaine (1)                                                   |
| 2.7                 | 342.1206      | 220.0839              | C00643 /<br>C01017 /<br>C09985 /<br>C19716 /<br>C21777             | 220.0848          | C <sub>11</sub> H <sub>12</sub> O <sub>3</sub> N <sub>2</sub> | 3.9167      |                                        |                  |                                                               |             |                                                         |             | *Hydroxy-L-tryptophan (1)                                                        |
| 2.8                 | 195.0350      | 72.9983               | C18587                                                             | 72.9986           | C <sub>2</sub> H <sub>3</sub> NS                              | 4.7946      |                                        |                  |                                                               |             |                                                         |             | Methyl isothiocyanate (1)                                                        |
| 3.7                 | 330.1094      | 208.0727              | C02381 /<br>C05610 /<br>C09816                                     | 208.0736          | C <sub>11</sub> H <sub>12</sub> O <sub>4</sub>                | 4.0322      |                                        |                  |                                                               |             |                                                         |             | *Sinapaldehyde (1)                                                               |
| 4.5                 | 278.0347      | 155.9980              | C02357 /<br>C02370                                                 | 155.9978          | C <sub>7</sub> H <sub>5</sub> O <sub>2</sub> Cl               | -1.3013     |                                        |                  |                                                               |             |                                                         |             | *2-Chlorobenzoate (1)                                                            |
| 0.9                 | 237.0989      | 115.0622              |                                                                    |                   |                                                               |             | P                                      | 115.0633         | C <sub>5</sub> H <sub>9</sub> O <sub>2</sub> N                | 9.8121      |                                                         |             |                                                                                  |
| 2.4                 | 422.2144      | 300.1777              |                                                                    |                   |                                                               |             | GKP                                    | 300.1798         | C <sub>13</sub> H <sub>24</sub> O <sub>4</sub> N <sub>4</sub> | 6.7493      |                                                         |             |                                                                                  |
| 0.9                 | 237.0989      | 115.0622              |                                                                    |                   |                                                               |             | P                                      | 115.0633         | C <sub>5</sub> H <sub>9</sub> O <sub>2</sub> N                | 9.8121      |                                                         |             |                                                                                  |

| General information |               |                       | KEGG Annotation |                   |                   |             | Home-made peptides database Annotation       |                   |                                                               |             | Intra-laboratory white wine nucleophilic compounds list |             | (1) KEGG Putative Name<br>(2) Home-made peptides Databases<br>(3) Identification |
|---------------------|---------------|-----------------------|-----------------|-------------------|-------------------|-------------|----------------------------------------------|-------------------|---------------------------------------------------------------|-------------|---------------------------------------------------------|-------------|----------------------------------------------------------------------------------|
| RT [min]            | Detected Mass | Neutral Mass [M] [Da] | Identity (ID)   | Neutral Mass [Da] | Molecular Formula | Error [ppm] | Peptide Sequences                            | Neutral Mass [Da] | Molecular Formula                                             | Error [ppm] | Identity                                                | Error [ppm] |                                                                                  |
| 2.4                 | 422.2144      | 300.1777              |                 |                   |                   |             | GKP                                          | 300.1798          | C <sub>13</sub> H <sub>24</sub> O <sub>4</sub> N <sub>4</sub> | 6.7493      |                                                         |             |                                                                                  |
| 2.4                 | 452.2247      | 330.1880              |                 |                   |                   |             | KPS /N /GGVV /ALQ /GA /GGVV /AAGL /AAAV      | 330.1903          | C <sub>14</sub> H <sub>26</sub> O <sub>5</sub> N <sub>4</sub> | 6.9082      |                                                         |             |                                                                                  |
| 3.0                 | 243.0553      | 121.0186              |                 |                   |                   |             | C                                            | 121.0198          | C <sub>3</sub> H <sub>7</sub> O <sub>2</sub> NS               | 9.4200      |                                                         |             |                                                                                  |
| 3.1                 | 549.2780      | 427.2413              |                 |                   |                   |             | KPPS /N /GGPVV /ALPQ /GA /GGPVV /AAGLP /AAPV | 427.2431          | C <sub>19</sub> H <sub>33</sub> O <sub>6</sub> N <sub>5</sub> | 4.2014      |                                                         |             |                                                                                  |
| 3.1                 | 521.2971      | 399.2604              |                 |                   |                   |             | KPR                                          | 399.2594          | C <sub>17</sub> H <sub>33</sub> O <sub>4</sub> N <sub>7</sub> | 2.3719      |                                                         |             |                                                                                  |
| 3.2                 | 423.2350      | 301.1983              |                 |                   |                   |             | GLL /ALV                                     | 301.2002          | C <sub>14</sub> H <sub>27</sub> O <sub>4</sub> N <sub>3</sub> | 6.1654      |                                                         |             |                                                                                  |
| 0.7                 | 244.0836      | 122.0469              |                 |                   |                   |             |                                              |                   |                                                               |             | Nu50                                                    | 6.3909      | C <sub>6</sub> H <sub>6</sub> N <sub>2</sub> O (2)                               |
| 0.9                 | 259.0500      | 137.0133              |                 |                   |                   |             |                                              |                   |                                                               |             | Nu59                                                    | 9.4109      |                                                                                  |
| 1,0                 | 273.0659      | 151.0292              |                 |                   |                   |             |                                              |                   |                                                               |             | Nu72                                                    | 7.9077      | C <sub>4</sub> H <sub>9</sub> NO <sub>3</sub> S (2)                              |
| 1,0                 | 347.0660      | 225.0293              |                 |                   |                   |             |                                              |                   |                                                               |             | Nu152                                                   | 6.8946      |                                                                                  |
| 1.2                 | 271.0521      | 149.0154              |                 |                   |                   |             |                                              |                   |                                                               |             | Nu68                                                    | 4.0748      |                                                                                  |
| 1.2                 | 443.0980      | 321.0613              |                 |                   |                   |             |                                              |                   |                                                               |             | Nu239                                                   | 3.7986      |                                                                                  |
| 1.2                 | 273.0658      | 151.0291              |                 |                   |                   |             |                                              |                   |                                                               |             | Nu72                                                    | 8.2387      | C <sub>4</sub> H <sub>9</sub> NO <sub>3</sub> S (2)                              |
| 1.2                 | 566.0594      | 444.0227              |                 |                   |                   |             |                                              |                   |                                                               |             | Nu311                                                   | 5.0888      |                                                                                  |
| 1.5                 | 235.0834      | 113.0467              |                 |                   |                   |             |                                              |                   |                                                               |             | Nu36                                                    | 8.1629      | C <sub>5</sub> H <sub>7</sub> NO <sub>2</sub> (2)                                |
| 2.2                 | 737.1350      | 615.0983              |                 |                   |                   |             |                                              |                   |                                                               |             | Nu341                                                   | 2.5593      |                                                                                  |
| 2.6                 | 232.0361      | 109.9994              |                 |                   |                   |             |                                              |                   |                                                               |             | Nu30                                                    | 5.4418      |                                                                                  |
| 1.2                 | 273.0658      | 151.0291              |                 |                   |                   |             |                                              |                   |                                                               |             | Nu72                                                    | 8.2387      | C <sub>4</sub> H <sub>9</sub> NO <sub>3</sub> S (2)                              |
| 1.2                 | 273.0658      | 151.0291              |                 |                   |                   |             |                                              |                   |                                                               |             | Nu72                                                    | 8.2387      | C <sub>4</sub> H <sub>9</sub> NO <sub>3</sub> S (2)                              |

| General information |               |                       | KEGG Annotation |                   |                   | Home-made peptides database Annotation |                   |                   |                   |             | Intra-laboratory white wine nucleophilic compounds list |             | (1) KEGG Putative Name<br>(2) Home-made peptides Databases<br>(3) Identification |
|---------------------|---------------|-----------------------|-----------------|-------------------|-------------------|----------------------------------------|-------------------|-------------------|-------------------|-------------|---------------------------------------------------------|-------------|----------------------------------------------------------------------------------|
| RT [min]            | Detected Mass | Neutral Mass [M] [Da] | Identity (ID)   | Neutral Mass [Da] | Molecular Formula | Error [ppm]                            | Peptide Sequences | Neutral Mass [Da] | Molecular Formula | Error [ppm] | Identity                                                | Error [ppm] |                                                                                  |
| 1.2                 | 566.0594      | 444.0227              |                 |                   |                   |                                        |                   |                   |                   |             | Nu311                                                   | 5.0888      |                                                                                  |
| 1.5                 | 235.0834      | 113.0467              |                 |                   |                   |                                        |                   |                   |                   |             | Nu36                                                    | 8.1629      | C <sub>5</sub> H <sub>7</sub> NO <sub>2</sub> (2)                                |
| 2.2                 | 737.1350      | 615.0983              |                 |                   |                   |                                        |                   |                   |                   |             | Nu341                                                   | 2.5593      |                                                                                  |
| 2.6                 | 232.0361      | 109.9994              |                 |                   |                   |                                        |                   |                   |                   |             | Nu30                                                    | 5.4418      |                                                                                  |
| 2.7                 | 325.0607      | 203.0240              |                 |                   |                   |                                        |                   |                   |                   |             | Nu126                                                   | 4.6478      | C <sub>7</sub> H <sub>9</sub> NO <sub>4</sub> S (2)                              |
| 2.8                 | 345.0867      | 223.0500              |                 |                   |                   |                                        |                   |                   |                   |             | Nu149                                                   | 5.1833      |                                                                                  |
| 3.0                 | 285.0661      | 163.0294              |                 |                   |                   |                                        |                   |                   |                   |             | Nu85                                                    | 4.4082      | C <sub>5</sub> H <sub>9</sub> NO <sub>3</sub> S (2)                              |
| 3.0                 | 315.0763      | 193.0396              |                 |                   |                   |                                        |                   |                   |                   |             | Nu112                                                   | 4.8036      |                                                                                  |
| 3.1                 | 285.0117      | 162.9750              |                 |                   |                   |                                        |                   |                   |                   |             | Nu84                                                    | 4.0270      | C <sub>4</sub> H <sub>5</sub> NO <sub>2</sub> S <sub>2</sub> (2)                 |
| 3.2                 | 355.0710      | 233.0343              |                 |                   |                   |                                        |                   |                   |                   |             | Nu158                                                   | 4.7692      | C <sub>8</sub> H <sub>11</sub> NO <sub>5</sub> S (2)                             |
| 3.2                 | 327.0761      | 205.0394              |                 |                   |                   |                                        |                   |                   |                   |             | Nu129                                                   | 5.2584      |                                                                                  |
| 3.2                 | 325.0604      | 203.0237              |                 |                   |                   |                                        |                   |                   |                   |             | Nu125                                                   | 5.3949      | C <sub>7</sub> H <sub>9</sub> NO <sub>4</sub> S (2)                              |
| 3.3                 | 410.0984      | 288.0617              |                 |                   |                   |                                        |                   |                   |                   |             | Nu207                                                   | 4.9901      | C <sub>15</sub> H <sub>12</sub> O <sub>6</sub> (2)                               |
| 3.4                 | 232.0361      | 109.9994              |                 |                   |                   |                                        |                   |                   |                   |             | Nu31                                                    | 5.8514      |                                                                                  |
| 3.4                 | 234.0520      | 112.0153              |                 |                   |                   |                                        |                   |                   |                   |             | Nu34                                                    | 3.0679      | C <sub>5</sub> H <sub>4</sub> O <sub>3</sub> (2)                                 |
| 3.5                 | 274.0465      | 152.0098              |                 |                   |                   |                                        |                   |                   |                   |             | Nu74                                                    | 4.9499      |                                                                                  |
| 3.6                 | 290.0776      | 168.0409              |                 |                   |                   |                                        |                   |                   |                   |             | Nu93                                                    | 4.4766      | C <sub>8</sub> H <sub>8</sub> O <sub>4</sub> (2)                                 |
| 3.7                 | 371.1354      | 249.0987              |                 |                   |                   |                                        |                   |                   |                   |             | Nu174                                                   | 5.1477      |                                                                                  |
| 3.8                 | 250.0830      | 128.0463              |                 |                   |                   |                                        |                   |                   |                   |             | Nu55                                                    | 6.5539      | C <sub>6</sub> H <sub>8</sub> O <sub>3</sub> (2)                                 |
| 3.9                 | 165.0244      | 42.9877               |                 |                   |                   |                                        |                   |                   |                   |             | Nu7                                                     | 3.7282      |                                                                                  |
| 4.0                 | 243.0887      | 121.0520              |                 |                   |                   |                                        |                   |                   |                   |             | Nu45                                                    | 3.6297      | C <sub>7</sub> H <sub>7</sub> NO (2)                                             |
| 4.1                 | 463.0706      | 341.0339              |                 |                   |                   |                                        |                   |                   |                   |             | Nu254                                                   | 4.1227      |                                                                                  |
| 4.2                 | 204.0414      | 82.0047               |                 |                   |                   |                                        |                   |                   |                   |             | Nu16                                                    | 6.8727      |                                                                                  |
| 4.3                 | 195.0345      | 72.9978               |                 |                   |                   |                                        |                   |                   |                   |             | Nu14                                                    | 8.9286      | C <sub>2</sub> H <sub>3</sub> NS (2)                                             |
| 4.3                 | 223.0658      | 101.0291              |                 |                   |                   |                                        |                   |                   |                   |             | Nu25                                                    | 6.1314      | C <sub>4</sub> H <sub>7</sub> NS (2)                                             |



| General information |               |                       | KEGG Annotation |                   |                                                               |             | Home-made peptides database Annotation |                   |                                                                |             | Intra-laboratory white wine nucleophilic compounds list |             | (1) KEGG Putative Name<br>(2) Home-made peptides Databases<br>(3) Identification               |
|---------------------|---------------|-----------------------|-----------------|-------------------|---------------------------------------------------------------|-------------|----------------------------------------|-------------------|----------------------------------------------------------------|-------------|---------------------------------------------------------|-------------|------------------------------------------------------------------------------------------------|
| RT [min]            | Detected Mass | Neutral Mass [M] [Da] | Identity (ID)   | Neutral Mass [Da] | Molecular Formula                                             | Error [ppm] | Peptide Sequences                      | Neutral Mass [Da] | Molecular Formula                                              | Error [ppm] | Identity                                                | Error [ppm] |                                                                                                |
| 4.3                 | 317.0705      | 195.0338              |                 |                   |                                                               |             |                                        |                   |                                                                |             | Nu117                                                   | 6.8780      |                                                                                                |
| 4.3                 | 405.1558      | 283.1191              |                 |                   |                                                               |             |                                        |                   |                                                                |             | Nu205                                                   | 5.7848      | C <sub>17</sub> H <sub>17</sub> NO <sub>3</sub> (2)                                            |
| 4.5                 | 262.0828      | 140.0461              |                 |                   |                                                               |             |                                        |                   |                                                                |             | Nu64                                                    | 7.0333      | C <sub>7</sub> H <sub>8</sub> O <sub>3</sub> (2)                                               |
| 4.5                 | 316.0867      | 194.0500              |                 |                   |                                                               |             |                                        |                   |                                                                |             | Nu116                                                   | 6.0822      |                                                                                                |
| 4.8                 | 315.0551      | 193.0184              |                 |                   |                                                               |             |                                        |                   |                                                                |             | Nu111                                                   | 6.3555      |                                                                                                |
| 5.2                 | 345.1018      | 223.0651              |                 |                   |                                                               |             |                                        |                   |                                                                |             | Nu151                                                   | 8.0940      |                                                                                                |
| 6.2                 | 420.1122      | 298.0755              |                 |                   |                                                               |             |                                        |                   |                                                                |             | Nu217                                                   | 6.2418      | C <sub>16</sub> H <sub>14</sub> N <sub>2</sub> O <sub>2</sub> S (2)                            |
| 6.6                 | 354.0475      | 232.0108              |                 |                   |                                                               |             |                                        |                   |                                                                |             | Nu156                                                   | 7.4246      |                                                                                                |
| 3.1                 | 494.2359      | 372.1992              | C03326          | 372.2009          | C <sub>16</sub> H <sub>28</sub> O <sub>6</sub> N <sub>4</sub> | 4.5809      | EKP /GLPS /APSV /GPTV                  | 372.2009          | C <sub>16</sub> H <sub>28</sub> O <sub>6</sub> N <sub>4</sub>  | 4.5836      |                                                         |             | (Ac)2-L-Lys-D-Ala-D-Ala (1)                                                                    |
| 3.8                 | 372.1356      | 250.0989              | C09007          | 250.0994          | C <sub>17</sub> H <sub>14</sub> O <sub>2</sub>                | 1.7993      | TM                                     | 250.0987          | C <sub>9</sub> H <sub>18</sub> O <sub>4</sub> N <sub>2</sub> S | 0.8037      |                                                         |             | 2-(2-phenylethyl)-chromone (1)                                                                 |
| 0.8                 | 191.0943      | 69.0576               | C02420 / C15668 | 69.0579           | C <sub>4</sub> H <sub>7</sub> N                               | 4.0401      |                                        |                   |                                                                |             | Nu11                                                    | 5.1050      | *1-Pyrroline (1)<br>C <sub>4</sub> H <sub>7</sub> N (2)                                        |
| 0.9                 | 275.0457      | 153.0090              | C00606          | 153.0096          | C <sub>3</sub> H <sub>7</sub> O <sub>4</sub> NS               | 3.7776      |                                        |                   |                                                                |             | Nu76                                                    | 3.9839      | 3-sulfinio-L-alanine (1)<br>C <sub>3</sub> H <sub>7</sub> NO <sub>4</sub> S (2)                |
| 4.1                 | 280.0504      | 158.0137              | C03591          | 158.0135          | C <sub>7</sub> H <sub>7</sub> O <sub>2</sub> Cl               | -1.6644     |                                        |                   |                                                                |             | Nu78                                                    | 6.8518      | 5-chloro-3-methylcatechol (1)                                                                  |
| 1.3                 | 237.0989      | 115.0622              |                 |                   |                                                               |             | P                                      | 115.0633          | C <sub>5</sub> H <sub>9</sub> O <sub>2</sub> N                 | 9.7252      | Nu37                                                    | 6.3393      | C <sub>5</sub> H <sub>9</sub> NO <sub>2</sub> (2)<br>Proline (3) <sup>a</sup>                  |
| 2.2                 | 300.0767      | 178.0400              |                 |                   |                                                               |             | CG                                     | 178.0412          | C <sub>5</sub> H <sub>10</sub> O <sub>3</sub> N <sub>2</sub> S | 6.8749      | Nu99                                                    | 6.6634      | C <sub>5</sub> H <sub>10</sub> N <sub>2</sub> O <sub>3</sub> S (2)<br>Cys-Gly (3) <sup>b</sup> |
| 2.8                 | 303.1094      | 181.0727              |                 |                   |                                                               |             | Y                                      | 181.0739          | C <sub>9</sub> H <sub>11</sub> O <sub>3</sub> N                | 6.5940      | Nu104                                                   | 4.7906      | C <sub>9</sub> H <sub>11</sub> NO <sub>3</sub> (2)                                             |
| 3.6                 | 417.1554      | 295.1187              |                 |                   |                                                               |             | N /GGY /GGY                            | 295.1168          | C <sub>13</sub> H <sub>17</sub> O <sub>5</sub> N <sub>3</sub>  | 6.1941      | Nu210                                                   | 6.4021      | C <sub>18</sub> H <sub>17</sub> NO <sub>3</sub> (2)                                            |

| General information |               |                       | KEGG Annotation    |                   |                                                                 |             | Home-made peptides database Annotation |                         |                                                                                                                                    |                     |          | Intra-laboratory white wine nucleophilic compounds list |  | (1) KEGG Putative Name<br>(2) Home-made peptides Databases<br>(3) Identification                                                                                                                                                      |
|---------------------|---------------|-----------------------|--------------------|-------------------|-----------------------------------------------------------------|-------------|----------------------------------------|-------------------------|------------------------------------------------------------------------------------------------------------------------------------|---------------------|----------|---------------------------------------------------------|--|---------------------------------------------------------------------------------------------------------------------------------------------------------------------------------------------------------------------------------------|
| RT [min]            | Detected Mass | Neutral Mass [M] [Da] | Identity (ID)      | Neutral Mass [Da] | Molecular Formula                                               | Error [ppm] | Peptide Sequences                      | Neutral Mass [Da]       | Molecular Formula                                                                                                                  | Error [ppm]         | Identity | Error [ppm]                                             |  |                                                                                                                                                                                                                                       |
| 2.2                 | 429.1195      | 307.0828              | C00051             | 307.0838          | C <sub>10</sub> H <sub>17</sub> O <sub>6</sub> N <sub>3</sub> S | 3.3086      | ACD /CEG                               | 307.0838                | C <sub>10</sub> H <sub>17</sub> O <sub>6</sub> N <sub>3</sub> S                                                                    | 3.3151              | Nu226    | 2.9683                                                  |  | Glutathione (GSH) (1)<br>GSH (2,3) <sup>a</sup>                                                                                                                                                                                       |
| 2.9                 | 356.1391      | 234.1024              | C21203             | 234.1021          | C <sub>10</sub> H <sub>19</sub> O <sub>4</sub> P                | -1.2559     | CL                                     | 234.1038                | C <sub>9</sub> H <sub>18</sub> O <sub>3</sub> N <sub>2</sub> S                                                                     | 6.0828              | Nu161    | 4.4850                                                  |  | Geranyl phosphate (1)<br>C <sub>9</sub> H <sub>18</sub> N <sub>2</sub> O <sub>3</sub> S (2)<br>Leu-Cys; Ile-Cys (3) <sup>b</sup>                                                                                                      |
| 3.0                 | 457.1497      | 335.1130              | C21162 /<br>C21163 | 335.1117          | C <sub>15</sub> H <sub>17</sub> O <sub>6</sub> N <sub>3</sub>   | -3.8047     | CDV /ADM<br>/EGM                       | 335.1151                | C <sub>12</sub> H <sub>21</sub> O <sub>6</sub> N <sub>3</sub> S                                                                    | 6.2606              | Nu247    | 5.2011                                                  |  | 7-Demethylmitomycin A (1)<br>6-Demethylmitomycin A (1)<br>Mitomycin B (1)<br>C <sub>12</sub> H <sub>21</sub> N <sub>3</sub> O <sub>6</sub> S /<br>C <sub>20</sub> H <sub>17</sub> NO <sub>4</sub> (2)<br>Val-Cys-Asp (3) <sup>b</sup> |
| 3.1                 | 455.2061      | 333.1694              | C11774             | 333.1689          | C <sub>17</sub> H <sub>23</sub> O <sub>4</sub> N <sub>3</sub>   | -1.6628     | CLV /ALM / AFP                         | [333.1722;<br>333.1689] | C <sub>14</sub> H <sub>27</sub> O <sub>4</sub> N <sub>3</sub> S /<br>C <sub>17</sub> H <sub>23</sub> O <sub>4</sub> N <sub>3</sub> | [8.4582;<br>1.6598] | Nu246    | 6.5294                                                  |  | Primidolol (1)<br>C <sub>14</sub> H <sub>27</sub> N <sub>3</sub> O <sub>4</sub> S (2)<br>Val-Ile-Cys;<br>Val-Leu-Cys (3) <sup>b</sup>                                                                                                 |

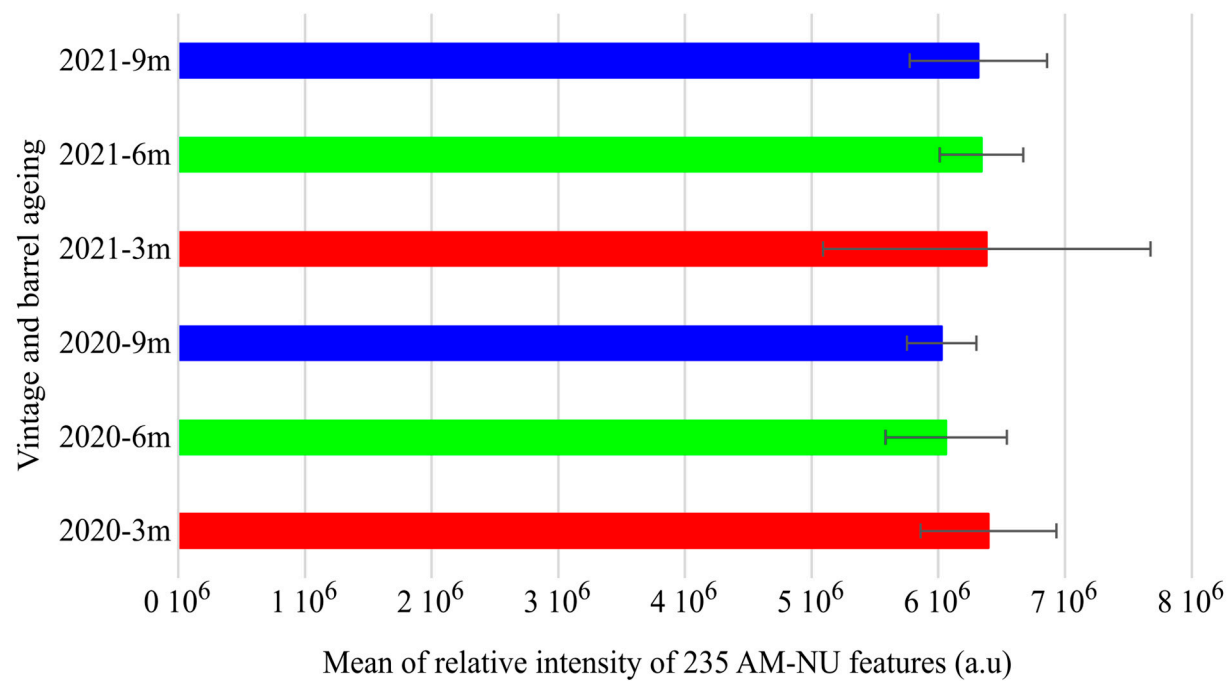

**Figure S2.** Summary of relative intensities of the assigned 235 AM-NU features found in 66 samples of CH-C-BW from 2020 and 2021 vintages, at 3, 6 and 9 months (m) of barrel ageing in new oak barrels
